# Supplementary material
Source: MDPI journal article supplement (https://www.mdpi.com/2073-4433/13/8/1317)
Supplement: s1 [file s1]

# Life Cycle Assessment of a Prospective Technology for Building-Integrated Production of Broccoli Microgreens

Michael G. Parkes <sup>1,2,\*</sup>, Julieth Paola Cubilos Tovar <sup>3</sup>, Filipe Dourado <sup>2</sup>, Tiago Domingos <sup>1</sup>  
and Ricardo F. M. Teixeira <sup>1</sup>

Results are first presented in depth for GWP to more easily depict all major findings using a single category only, and to identify the main contributors. Results are shown for both supply scenarios (CS and LS) and the renewable energy variation (PV). Finally, the results of ecotoxicity indicators are presented in Section 3.2. The analysis and explanation of results is included in the Discussion section. (Table S1)

**Table S1.** Data for GWP

| Impact category                      | Reference unit | 18.58 |       | 22.22 |       |    | 20%                  |        |                      |        |                      |       |
|--------------------------------------|----------------|-------|-------|-------|-------|----|----------------------|--------|----------------------|--------|----------------------|-------|
|                                      |                | CS    | CS-PV | LS    | LS-PV |    | CS to PV<br>% change |        | LS to PV<br>% change |        | CS to LS<br>% change |       |
| Freshwater Ecotoxicity (kg 1,4-DCB)  | kg 1,4-DCB     | 1.59  | 1.28  | 3.19  | 2.89  | FE | -19%                 | 123.93 | -10%                 | 110.61 | 101%                 | 49.67 |
| Marine Ecotoxicity (kg 1,4-DCB)      | kg 1,4-DCB     | 2.11  | 1.74  | 4.21  | 3.84  | ME | -18%                 | 121.33 | -9%                  | 109.63 | 100%                 | 49.96 |
| Terrestrial Ecotoxicity (kg 1,4-DCB) | kg 1,4-DCB     | 79.88 | 89.39 | 85.53 | 95.03 | TE | 12%                  | 89.36  | 11%                  | 90.00  | 7%                   | 93.40 |
| Human Toxicity (kg 1,4-DCB)          | kg 1,4-DCB     | 26.46 | 22.96 | 60.86 | 57.36 | HT | -13%                 | 115.23 | -6%                  | 106.10 | 130%                 | 43.48 |

**Table S2.** Data for Ecotoxicity

| Impact category         | 18.58 |       | 22.22 |       |
|-------------------------|-------|-------|-------|-------|
|                         | CS    | CS-PV | LS    | LS-PV |
| Freshwater Ecotoxicity  | 1.59  | 1.28  | 3.19  | 2.89  |
| Marine Ecotoxicity      | 2.11  | 1.74  | 4.21  | 3.84  |
| Terrestrial Ecotoxicity | 79.88 | 89.39 | 85.53 | 95.03 |
| Human Toxicity          | 26.46 | 22.96 | 60.86 | 57.36 |

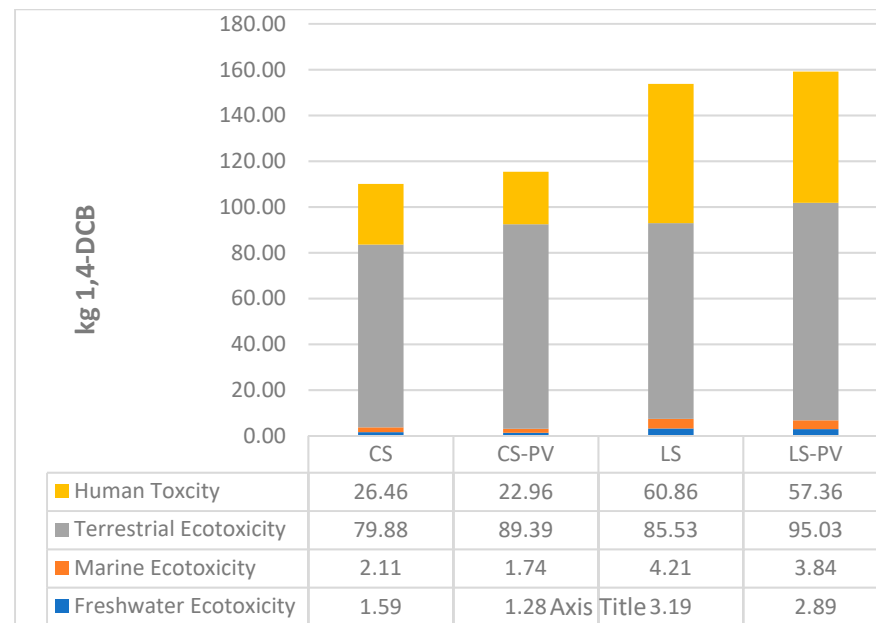

**Figure S1.** Graph for Ecotoxicity

### LCA Inventory

The following are the details of material inputs applied in the Circular and Linear supply chain LCA model developed in OpenLCA.

Includes materials required for all infrastructure related to the installation and integration of the IVF with the building, Technology Infrastructure has a life time of 20 years to produce 54,6 ton of broccoli annually.

Equipment with lifetime of 10 years or 27,3 ton of broccoli; LED, sensors, harvest and trays.

LCI Infrastructure of the building-integrated IVF technology, grouped by equipment types of Indoor Vertical Farm (IVF), hydroponic system, work area, Internet of Things (IoT) and Photovoltaic System (PV), the latter applicable to the renewable energy scenarios only. (More detailed in Table S3)

**Table S3.** Indoor Vertical Farm Infrastructure.

| Technology                 | Process        | Input                                              | Amount  | Unit |
|----------------------------|----------------|----------------------------------------------------|---------|------|
| Indoor Vertical Farm (IVF) | Grow Chamber   | Polystyrene slab and Aluminum                      | 580.000 | Kg   |
|                            |                | Cladding, crossbar-pole, aluminum                  | 150.700 | m2   |
|                            | Floor Covering | Epoxy resin insulator, SiO2                        | 123.000 | Kg   |
|                            |                | Tap Water                                          |         |      |
|                            | Trays          | PVC, Bulk, polymerized Extrusion of Plastic Sheets | 168.000 | kg   |
|                            | Racks          | Steel, low-alloyed                                 | 280.000 | Kg   |
|                            | Pipes          | PVC, Bulk, polymerized plastic Pipes               | 31.800  | Kg   |
|                            | Clamps         | Steel, chromium steel 18/8                         | 3.560   | Kg   |
|                            | Valves         | Brass, Tetrafluoroethylene                         | 1.200   | Kg   |
|                            | Cables         | cable, three-conductor cable                       | 46.170  | m    |

|                              |                            |                                                                                     |           |      |
|------------------------------|----------------------------|-------------------------------------------------------------------------------------|-----------|------|
|                              | Light Emitting Diode (LED) | aluminum, section bar, LED, transformer                                             | 251.200   | Kg   |
|                              |                            | Electricity, low voltage                                                            | 57000.000 | MJ   |
|                              |                            | cable, three-conductor cable                                                        | 5.300     | m    |
|                              | Assembly                   | Electricity                                                                         | 106.920   | MJ   |
|                              | Land Use                   | Occupation, urban built                                                             | 22.000    | M2   |
|                              | Transport                  | Freight, lorry 3.5-7.5 metric ton                                                   | 72.000    | t*km |
|                              | Climate Control            | Air compressor 4kW, Ventilation System, 10 kW / Heat pump, diffusion absorption 4kW | 3.000     | Item |
| Hydroponic System            | Pipes                      | PVC, Bulk, polymerized                                                              | 6.870     | Kg   |
|                              | Clamps                     | Steel, chromium steel 18/8                                                          | 17.500    | Kg   |
|                              | Valves                     | Brass, Tetrafluoroethylene                                                          | 3.200     | Kg   |
|                              | Water Pump                 | Water pump 22kW                                                                     | 1.000     | Item |
| Work Area                    | Work Room                  | Polystyrene slab and Aluminum                                                       | 386.000   | Kg   |
|                              |                            | Cladding, crossbar-pole, aluminum                                                   | 100.000   | m2   |
|                              | Land Use                   | Occupation, urban built                                                             | 14.700    | M2   |
|                              | Harvest                    | electronics equipment                                                               | 2.200     | kg   |
|                              |                            | metal bench work space                                                              | 277.185   | kg   |
|                              |                            | polyethylene, plastic equipment                                                     | 28.245    | kg   |
|                              |                            | chromium steel trolley & trays                                                      | 277.185   | kg   |
|                              | Sensors                    | Metals, electronic unit, plastics, rubber and coating                               | 1.91547   | kg   |
| Internet of Things (IoT) Hub | Main Hub                   | Electronics and electrical fuses, switches, meter, circuitary.                      | 136       | Item |
|                              | Hub Screen and internet    | Wifi Router and display interface                                                   | 2         | Item |
|                              | Cables                     | Metals and plastics for cables, ducting and mounting rail                           | 11.016    | Kg   |
| Photovoltaic System          | Solar Panels               | photovoltaic facade installation, 3kWp, multi-Si, panel, mounted, at building       | 10        | Item |

Developed based on the integrated controlled environment agriculture system installed within the IVF, the table outlines the primary electronics and communications equipment. This includes all components of the IVF interface panel and materials required to offer a software operated system. The life time assumes is 20 years for replacement.

Sensors were based on Schiender Electric products, 6 Weather station Sensors (KNX - CO<sub>2</sub>, Humidity and Temperature substitute for real sensor), 2 Communication Sensors (Harmony Hub), 1 Controlador (M241).

### Photovoltaic System

The PV System infrastructure was designed to provide energy for the most demanding period of functioning of the vertical farm, that which LEDs and Climate control are on at the same time. This period corresponds to the period of plant growth and therefore lasts for 12 hours.

During this period the LEDs consume every hour 6,53 kWh and the Climate control 4,47 kWh totalizing 132 kWh/day or (aprox) 4 MWh/month (around 70% of total consumption in Baseline).

Since the photovoltaic production varies throughout the year, it is impossible to full fill this energy requirement without batteries or extreme overproduction. In order to assess the impacts of such a system it was assumed that the system only had to produce the amount of energy needed for the growing phase as yearly average. In that way there is no energy injected in to the grid and the growing phase is fully fed by photovoltaics.

Using the tool "[https://re.jrc.ec.europa.eu/pvg\\_tools/en/](https://re.jrc.ec.europa.eu/pvg_tools/en/)" (accessed on 11 August 2022) it was possible to determine the energy generated monthly with a 1kWp panel in the worst (winter) and best (summer) case, with an average of 130kWh.

The input from EcoInvent 3.8 "photovoltaic facade installation, 3kWp, multi-Si, panel, mounted, at building" from a global market provider was used to estimate the impacts of building such infrastructure. Its lifetime of 30 years (as in EcoInvent) allows a production of 82,1 tons of broccolee.

Due to seasonal variation in weather and its impact on energy generation, a PV system in reality could not fulfill the total energy demand without batteries or extreme overproduction. To address this, we assumed the monthly electricity demand as a fixed amount of 4620 kWh with no excess electricity stored or transferred into the energy grid. The size of the PV infrastructure required was determined using the Photovoltaic Geographical Information System [55]. According to this tool, monthly solar in-plane irradiation of the region in Lisbon varies between 116 kWh/m<sup>2</sup> in winter and 222 kWh/m<sup>2</sup> in summer. The tool then calculated that a 3-kWh solar installation without shadowing enables the monthly production of 313 kWh in winter and 555 kWh in summer. The average of these values was applied to estimate the monthly production of a 3-kWh installation as 463 kWh. Covering the fixed electricity demand of 4620 kWh thus required 10 items (PV panels) (Table S4).

**Table S4.** Calculation of the number of 3kWp panels needed.

| Growing Consume per day (kwh) | Summer Produce per day (kwh) | Winter Produce per day (kwh) |
|-------------------------------|------------------------------|------------------------------|
| 132                           | 180/30 *3 = 18               | 100/30 *3 = 10               |
| Consume per month (kwh)       | Panels                       | Panels                       |
| 3 960                         | 132/18=7.3333                | 132/10=13.2                  |

### Processes

LCI of the processes applied for IVF operations with the system boundary 6 processes: Seeding, Growing, Harvest, Packaging, and Delivery are provided with material inputs. Units describe the total volume of inputs per kilograms of fresh weight (kg/kg FW), electricity is measure in mega-joules per fresh weight (MJ/kg FW), water in liters (L/kg FW) and kilometers for transportation (km/kg FW). (More detailed in Table S6)

**Table S5.** Process (All units per Function unit of 1 kg of Fresh Weight).

| Process  | Input                                                          | Amount   | Unit       |
|----------|----------------------------------------------------------------|----------|------------|
| Seeding  | Polyethylene (from Trays)                                      | 2,31     | g / kg FW  |
|          | Extrusion of plastic Sheet                                     |          |            |
|          | Coconut fiber                                                  | 3,456    | Kg / kg FW |
|          | Cauliflower Seeds                                              | 0,070    | Kg / kg FW |
| Growing  | Tap water                                                      | 17       | L / kg FW  |
|          | NPK (15-15-15) fertilizer                                      | 21,42    | g / kg FW  |
|          | Electricity (LEDs)                                             | 37,63    | MJ / kg FW |
|          | Sensors                                                        | 1 / LT   | Group      |
|          | Electricity (Equipment)                                        | 48       | MJ / kg FW |
| Harvest  | Equipment                                                      | 1 / LT   | Group      |
|          | Compost                                                        | 3.456    | Kg         |
| Cleaning | cleaning consumables, without water, in 13.6% solution state   | 0,751    | kg / kg FW |
|          | Electricity                                                    | 0,0922   | MJ / kg FW |
|          | Water                                                          | 150      | L / kg FW  |
|          | Soap                                                           | 1,9      | g / kg FW  |
|          | polyethylene terephthalate, granulate, amorphous               | 0,94     | g / kg FW  |
|          | Tissue Paper                                                   | 5,7      | g / kg FW  |
|          | Clothes                                                        | 1/LT     | Group      |
| Compost  |                                                                |          |            |
|          | 1-propanol                                                     | 0.0048   | kg         |
|          | diesel                                                         | 2.00E-04 | kg         |
|          | ethanol, without water, in 99.7% solution state, from ethylene | 0.0055   | kg         |
|          | ethyl acetate                                                  | 0.0012   | kg         |
|          | polyethylene, high density, granulate                          | 0.0276   | kg         |
|          | polyethylene, low density, granulate                           | 0.0324   | kg         |
|          | toluene, liquid                                                | 0.0017   | Kg         |
|          | ethanol, without water, in 99.7% solution state, from ethylene | 0.0055   | kg         |
|          | ethyl acetate                                                  | 0.0012   | kg         |
|          | polyethylene, high density, granulate                          | 0.0276   | kg         |
|          | polyethylene, low density, granulate                           | 0.0324   | kg         |
|          | toluene, liquid                                                | 0.0017   | Kg         |
|          | stretch blow moulding                                          | 2.34E-02 | kg         |
|          | polypropylene, granulate                                       | 1.38E-02 | kg         |
| Labels   | polyethylene terephthalate, granulate, bottle grade            | 9.60E-03 | kg         |
|          | electricity, low voltage                                       | 9.18E-03 | MJ         |
|          |                                                                |          |            |

Collapsed version

**Table S6.** IVF Operating Processes.

| Process   | Input                                                 | Amount   | Unit          |
|-----------|-------------------------------------------------------|----------|---------------|
| Seeding   | Trays (Polyethylene)                                  | 2.31     | g / kg FW     |
|           | Extrusion of plastic Sheet                            |          |               |
|           | Substrate (Coconut fiber)                             | 3        | Kg / kg FW    |
|           | Seeds                                                 | 0.07     | Kg / kg FW    |
| Growing   | Tap water                                             | 17       | L / kg FW     |
|           | NPK (15-15-15) fertilizer                             | 21.42    | g / kg FW     |
|           | Electricity (LEDs)                                    | 37.63    | MJ / kg FW    |
|           | Sensors                                               | 1 / LT   | Group         |
|           | Electricity (Equipment)                               | 48       | MJ / kg FW    |
| Harvest   | Equipment                                             | 1 / LT   | Group         |
|           | Compost                                               | 3.456    | Kg            |
| Cleaning  | Dry cleaning consumables, plastics, and tissue papers | 7.391    | kg / kg FW    |
|           | Electricity                                           | 0.0922   | MJ / kg FW    |
|           | Water                                                 | 150      | L / kg FW     |
|           | Soap                                                  | 1.9      | g / kg FW     |
|           | Clothes                                               | 1/LT     | Group         |
| Packaging | Electricity (lighting)                                | 0.09216  | MJ / kg FW    |
|           | Electricity (sealing bags)                            | 0.030732 | MJ / kg FW    |
|           | Plastic bags                                          | 10       | Items / kg FW |
|           | Labels                                                | 10       | Items / kg FW |
|           | Cardboard box                                         | 0.186667 | kg / kg FW    |
| Delivery  | Truck with refrigeration machine                      | 12.7007  | kg*km / kg FW |

### Process Assumptions

#### Cauli Flower Seeds

Our function for broclee seeds was a copied from Agribalyse “Cauliflower seed, conventional, at production site/FR U” that has an output of 190 kg. It was made two alterations so it could be replicated in EcoInvent. Firstly, since cauliflower seeds function has dependency on seeds, and the seeds have dependency on seeds, there was an input loop). To solve that, inputs from seedlings and seeds were combined and transferred to EcoInvent based on a solution of the 2-variable system, writing the Seeds function without dependency on seedlings. This function had the output slightly less than 190kg. The, the input amount were calculated for 1kg of seed with unit conversion when it was necessary (conversion factors in table). The function is sent separated

#### Coconut Fiber

The function that produces Coconut fiber has the same inputs as Agribalyse “Coconut fiber, at regional storehouse/kg”. The only difference is that in Agribalyse the Coconut dehusked had “0” amount. From literature we have chosen the ratio between Coco Fiber and Coco Deshusked to be 75%. Then it is necessary 1,33 kg of coconut husk to produce 1 kg of coco Fibre.

**Table S7.** Coconut fiber.

| Flow                           | Unit | Amount      |
|--------------------------------|------|-------------|
| Coconut dehusked, coconut husk | kg   | 1,33333     |
| electricity, high voltage      | MJ   | 0,406799675 |
| extrusion, plastic film        | kg   | 0,045       |

|                                                   |      |       |
|---------------------------------------------------|------|-------|
| polyethylene, low density, granulate              | kg   | 0,045 |
| transport, freight, lorry 16-32 metric ton, EURO5 | t*km | 0,035 |
| transport, freight, lorry >32 metric ton, EURO5   | t*km | 0,26  |
| transport, freight, sea, container ship           | t*km | 11,2  |

**Table S8.** Equipment for Processes. Clothes (lifetime 1 year).

| Equipment | Input                           | Amount | Unit |
|-----------|---------------------------------|--------|------|
| Clothes   | textile, woven cotton           | 0,7    | Kg   |
| Glasses   | polyurethane, flexible foam     | 0,02   | Kg   |
|           | Polycarbonate                   | 0,08   |      |
| Hair net  | textile, nonwoven polypropylene | 0,05   | Kg   |
| Gloves    | Nylon 6                         | 0,006  | Kg   |

#### Packaging

We assumed each plastic bag has an area of 20x20 cm<sup>2</sup> and its empty weight is 6 grams. To package 1kg of broccoli divided in 100 grams bags we need 10 bags and so 10 labels. Regarding the electricity needed for the sealing process, from the literature we chose as referential data 6.3 kW for conducting 3 cycles in 1 min, from which we obtained 0.8537 Wh/ bag as our electricity input.

Assumption on carton box total capacity is of 10 kg and, from measurements, a similar box empty weight is 0.70 kg. To cover the total amount of daily bags used we need two of them, thus 1.4 kg.

**Table S9.** Plastic bags (x10).

| Inputs                                                         | Unit     | Amount |
|----------------------------------------------------------------|----------|--------|
| 1-propanol                                                     | 0.0048   | kg     |
| diesel                                                         | 2.00E-04 | kg     |
| ethanol, without water, in 99.7% solution state, from ethylene | 0.0055   | kg     |
| ethyl acetate                                                  | 0.0012   | kg     |
| polyethylene, high density, granulate                          | 0.0276   | kg     |
| polyethylene, low density, granulate                           | 0.0324   | kg     |
| toluene, liquid                                                | 0.0017   | kg     |

#### Labels production

For the “Labels production” process, we decided to copy only those inputs which are applied to each plastic bag.

**Table S10.** Labels (x10).

| Inputs                                              | Unit     | Amount |
|-----------------------------------------------------|----------|--------|
| stretch blow moulding                               | 2.34E-02 | kg     |
| polypropylene, granulate                            | 1.38E-02 | kg     |
| polyethylene terephthalate, granulate, bottle grade | 9.60E-03 | kg     |
| electricity, low voltage                            | 9.18E-03 | MJ     |

#### Delivery assumptions

We are assuming the total packaged broccoli weight is made of:

- 
- Broccoli leaves = 1 kg
  - LDPE + HDPE + Carton box from Packaging = 0.24667 kg
  - Polypropylene + PET from Labels = 0.0234

Total = 1.27007 kg

The distance taking into account is of 10 kms radius.

To model the vehicle used, the process '*transport, freight, lorry with refrigeration machine, 3.5-7.5 ton, EURO6, R134a refrigerant, cooling*' was selected from the EcoInvent database. It was assumed the vehicle was made after 2015, and as such, adheres to the Euro 6 European emission standard (<https://eur-lex.europa.eu/legal-content/EN/TXT/?uri=celex%3A32007R0715>) (Accessed on 11 August 2022).

The refrigerant chosen for the cooling cycle is R134a, as it is more commonly used than CO<sub>2</sub> for this application in Portugal.
